# Supplementary material for: Interactive voice response (IVR) for tobacco cessation: a systematic review
Source: HighWire-hosted journal article supplement (doi:10.1136/bmjopen-2023-081972), 2024-07-01
Supplement: bmjopen-2023-081972supp001_data_supplement.pdf [file bmjopen-2023-081972supp001_data_supplement.pdf]

## Appendix A. Final search strategies

2023 May 3

Ovid Multifile

Database: Embase &lt;1974 to 2023 May 02&gt;, APA PsycInfo &lt;1806 to April Week 4 2023&gt;, Ovid MEDLINE(R)

ALL &lt;1946 to May 02, 2023&gt;

Search Strategy:

- 
- 1 Smoking Cessation/ (115928)
  - 2 Smoking Reduction/ (519)
  - 3 "Tobacco Use Cessation"/ (70076)
  - 4 Smoking Cessation Agents/ (314)
  - 5 "Tobacco Use Cessation Devices"/ (5573)
  - 6 Smoking/th [therapy] (2353)
  - 7 exp Tobacco Smoking/th [therapy] (561)
  - 8 "Tobacco Use Disorder"/th [therapy] (3548)
  - 9 Vaping/th [therapy] (17)
  - 10 ((smoking or smoker\* or tobacco\* or nicotine or cigar? or cigarette\* or cigarillo? or vape\$1 or vaping or ecig\* or e-cig\* or e-vape\$1 or e-vaping or evape\$1 or evaping or snuff or snus or gutka or gutkas or naswar) adj5 (abstain\* or abstinen\* or cease or ceased or ceases or cessation\* or dehabituat\* or desist\* or discontinu\* or end or ended or ending or ends or "give up" or "giving up" or "gives up" or "gave up" or halt\* or quit\* or stop\*)).tw,kw,kf. (135877)
  - 11 ((smoking or smoker\* or tobacco\* or nicotine or cigar? or cigarette\* or cigarillo? or vape\$1 or vaping or ecig\* or e-cig\* or e-vape\$1 or e-vaping or evape\$1 or evaping or snuff or snus or gutka or gutkas or naswar) adj5 (curb\* or curtail\* or decreas\* or diminish\* or lessen\* or limit\* or lower\* or reduc\* or taper\* or cut back or cuts back or cutting back)).tw,kw,kf. (111997)
  - 12 or/1-11 [TOBACCO CESSATION] (243977)
  - 13 ((interactive or inter-active) adj voice record\*).tw,kw,kf. (60)
  - 14 ((interactive or inter-active) adj voice respon\*).tw,kw,kf. (2573)
  - 15 voice response unit?.tw,kw,kf. (5)
  - 16 (IVR adj5 (call\* or cellphon\* or cell-phon\* or dialogue\* or mobile? or phon\* or record\* or smartphon\* or smart-phon\* or system? or technolog\* or telephon\*)).tw,kw,kf. (1220)
  - 17 ((IVR or IVRS) and (interactive or inter-active or voice or record\* or respons\*)).tw,kw,kf. (2376)
  - 18 AI-IVR.tw,kw,kf. (2)
  - 19 ((automated or digital\* or intelligent or interactive or inter-active or smart or virtual) adj3 (assistant? or PDA or PDAs)).tw,kw,kf. (4153)
  - 20 (Alexa or Bixby or Cortana or Siri or Google Assistant).tw,kw,kf. (8019)
  - 21 Reminder Systems/ (6619)
  - 22 Speech Recognition Software/ (2074)
  - 23 or/13-22 [IVR] (24377)
  - 24 12 and 23 [TOBACCO CESSATION - IVR] (334)
  - 25 24 use medall [MEDLINE RECORDS] (146)
  - 26 smoking cessation/ (115928)
  - 27 smoking cessation program/ (3867)
  - 28 smoking reduction/ (519)
  - 29 smoking cessation agent/ (314)

- 30 nicotine gum/ (3087)
- 31 smoking/th [therapy] (2353)
- 32 tobacco dependence/th [therapy] (4751)
- 33 ((smoking or smoker\* or tobacco\* or nicotine or cigar? or cigarette\* or cigarillo? or vape\$1 or vaping or ecig\* or e-cig\* or e-vape\$1 or e-vaping or evape\$1 or evaping or snuff or snus or gutka or gutkas or naswar) adj5 (abstain\* or abstinen\* or cease or ceased or ceases or cessation\* or dehabituat\* or desist\* or discontinu\* or end or ended or ending or ends or "give up" or "giving up" or "gives up" or "gave up" or halt\* or quit\* or stop\*)).tw,kw,kf. (135877)
- 34 ((smoking or smoker\* or tobacco\* or nicotine or cigar? or cigarette\* or cigarillo? or vape\$1 or vaping or ecig\* or e-cig\* or e-vape\$1 or e-vaping or evape\$1 or evaping or snuff or snus or gutka or gutkas or naswar) adj5 (curb\* or curtail\* or decreas\* or diminish\* or lessen\* or limit\* or lower\* or reduc\* or taper\* or cut back or cuts back or cutting back)).tw,kw,kf. (111997)
- 35 or/26-34 [TOBACCO CESSATION] (244250)
- 36 ((interactive or inter-active) adj voice record\*).tw,kw,kf. (60)
- 37 ((interactive or inter-active) adj voice respon\*).tw,kw,kf. (2573)
- 38 voice response unit?.tw,kw,kf. (5)
- 39 (IVR adj5 (call\* or cellphon\* or cell-phon\* or dialogue\* or mobile? or phon\* or record\* or smartphon\* or smart-phon\* or system? or technolog\* or telephon\*)).tw,kw,kf. (1220)
- 40 ((IVR or IVRS) and (interactive or inter-active or voice or record\* or respons\*)).tw,kw,kf. (2376)
- 41 AI-IVR.tw,kw,kf. (2)
- 42 ((automated or digital\* or intelligent or interactive or inter-active or smart or virtual) adj3 (assistant? or PDA or PDAs)).tw,kw,kf. (4153)
- 43 (Alexa or Bixby or Cortana or Siri or Google Assistant).tw,kw,kf. (8019)
- 44 reminder system/ (6830)
- 45 automatic speech recognition/ (1338)
- 46 or/36-45 [IVR] (23924)
- 47 35 and 46 [TOBACCO CESSATION - IVR] (340)
- 48 47 use oemezd [EMBASE RECORDS] (156)
- 49 Smoking Cessation/ (115928)
- 50 "Tobacco Use Disorder"/ (26295)
- 51 ((smoking or smoker\* or tobacco\* or nicotine or cigar? or cigarette\* or cigarillo? or vape\$1 or vaping or ecig\* or e-cig\* or e-vape\$1 or e-vaping or evape\$1 or evaping or snuff or snus or gutka or gutkas or naswar) adj5 (abstain\* or abstinen\* or cease or ceased or ceases or cessation\* or dehabituat\* or desist\* or discontinu\* or end or ended or ending or ends or "give up" or "giving up" or "gives up" or "gave up" or halt\* or quit\* or stop\*)).tw,id. (134325)
- 52 ((smoking or smoker\* or tobacco\* or nicotine or cigar? or cigarette\* or cigarillo? or vape\$1 or vaping or ecig\* or e-cig\* or e-vape\$1 or e-vaping or evape\$1 or evaping or snuff or snus or gutka or gutkas or naswar) adj5 (curb\* or curtail\* or decreas\* or diminish\* or lessen\* or limit\* or lower\* or reduc\* or taper\* or cut back or cuts back or cutting back)).tw,id. (111682)
- 53 or/49-52 [TOBACCO CESSATION] (252880)
- 54 ((interactive or inter-active) adj voice record\*).tw,id. (58)
- 55 ((interactive or inter-active) adj voice respon\*).tw,id. (2522)
- 56 voice response unit?.tw,id. (5)
- 57 (IVR adj5 (call\* or cellphon\* or cell-phon\* or dialogue\* or mobile? or phon\* or record\* or smartphon\* or smart-phon\* or system? or technolog\* or telephon\*)).tw,id. (1210)
- 58 ((IVR or IVRS) and (interactive or inter-active or voice or record\* or respons\*)).tw,id. (2327)
- 59 AI-IVR.tw,id. (2)

60 ((automated or digital\* or intelligent or interactive or inter-active or smart or virtual) adj3  
(assistant? or PDA or PDAs)).tw,id. (4035)  
61 (Alexa or Bixby or Cortana or Siri or Google Assistant).tw,id. (7941)  
62 Automated Speech Recognition/ (2494)  
63 or/54-62 [IVR] (18078)  
64 53 and 63 [TOBACCO CESSATION - IVR] (228)  
65 64 use psych [PSYCINFO RECORDS] (38)  
66 25 or 48 or 65 [ALL DATABASES] (340)  
67 remove duplicates from 66 (201) [TOTAL UNIQUE RECORDS]  
68 67 use medall [MEDLINE UNIQUE RECORDS] (145)  
69 67 use oemezd [EMBASE UNIQUE RECORDS] (50)  
70 67 use psych [PSYCINFO UNIQUE RECORDS] (6)

\*\*\*\*\*

CINAHL

| #   | Query      | Limiters/Expanders                      | Last Run Via                                                                                                   | Results |
|-----|------------|-----------------------------------------|----------------------------------------------------------------------------------------------------------------|---------|
| S24 | S19 OR S23 | Search modes - Find all my search terms | Interface - EBSCOhost Research Databases Search Screen - Advanced Search Database - CINAHL Plus with Full Text | 112     |
| S23 | S7 AND S22 | Search modes - Find all my search terms | Interface - EBSCOhost Research Databases Search Screen - Advanced Search Database - CINAHL Plus with Full Text | 66      |
| S22 | S20 OR S21 | Search modes - Find all my search terms | Interface - EBSCOhost Research Databases Search Screen - Advanced Search                                       | 1,199   |

|     |                                                                     |                                            |                                                                                                                                           |       |
|-----|---------------------------------------------------------------------|--------------------------------------------|-------------------------------------------------------------------------------------------------------------------------------------------|-------|
|     |                                                                     |                                            | Database -<br>CINAHL Plus<br>with Full Text                                                                                               |       |
| S21 | TX "interactive voice" W0 record*                                   | Search modes - Find<br>all my search terms | Interface -<br>EBSCOhost<br>Research<br>Databases<br>Search Screen<br>- Advanced<br>Search<br>Database -<br>CINAHL Plus<br>with Full Text | 23    |
| S20 | TX "interactive voice response"                                     | Search modes - Find<br>all my search terms | Interface -<br>EBSCOhost<br>Research<br>Databases<br>Search Screen<br>- Advanced<br>Search<br>Database -<br>CINAHL Plus<br>with Full Text | 1,181 |
| S19 | S7 AND S18                                                          | Search modes - Find<br>all my search terms | Interface -<br>EBSCOhost<br>Research<br>Databases<br>Search Screen<br>- Advanced<br>Search<br>Database -<br>CINAHL Plus<br>with Full Text | 82    |
| S18 | S8 OR S9 OR S10 OR S11 OR S12 OR S13 OR S14 OR<br>S15 OR S16 OR S17 | Search modes - Find<br>all my search terms | Interface -<br>EBSCOhost<br>Research<br>Databases<br>Search Screen<br>- Advanced<br>Search<br>Database -<br>CINAHL Plus<br>with Full Text | 6,342 |

|     |                                                                                                                                                                                                                                                                    |                                         |                                                                                                                |       |
|-----|--------------------------------------------------------------------------------------------------------------------------------------------------------------------------------------------------------------------------------------------------------------------|-----------------------------------------|----------------------------------------------------------------------------------------------------------------|-------|
| S17 | (MH "Voice Recognition Systems")                                                                                                                                                                                                                                   | Search modes - Find all my search terms | Interface - EBSCOhost Research Databases Search Screen - Advanced Search Database - CINAHL Plus with Full Text | 1,311 |
| S16 | (MH "Reminder Systems")                                                                                                                                                                                                                                            | Search modes - Find all my search terms | Interface - EBSCOhost Research Databases Search Screen - Advanced Search Database - CINAHL Plus with Full Text | 3,117 |
| S15 | TI ( Alexa or Bixby or Cortana or Siri or "Google Assistant" ) OR AB ( Alexa or Bixby or Cortana or Siri or "Google Assistant" )                                                                                                                                   | Search modes - Find all my search terms | Interface - EBSCOhost Research Databases Search Screen - Advanced Search Database - CINAHL Plus with Full Text | 426   |
| S14 | TI ( (automated or digital* or intelligent or interactive or inter-active or smart or virtual) N3 (assistant# or PDA or PDAs) ) OR AB ( (automated or digital* or intelligent or interactive or inter-active or smart or virtual) N3 (assistant# or PDA or PDAs) ) | Search modes - Find all my search terms | Interface - EBSCOhost Research Databases Search Screen - Advanced Search Database - CINAHL Plus with Full Text | 950   |
| S13 | TI "AI-IVR" OR AB "AI-IVR"                                                                                                                                                                                                                                         | Search modes - Find all my search terms | Interface - EBSCOhost Research                                                                                 | 0     |

|     |                                                                                                                                                                                                                                                                                                                                    |                                            |                                                                                                                                           |     |
|-----|------------------------------------------------------------------------------------------------------------------------------------------------------------------------------------------------------------------------------------------------------------------------------------------------------------------------------------|--------------------------------------------|-------------------------------------------------------------------------------------------------------------------------------------------|-----|
|     |                                                                                                                                                                                                                                                                                                                                    |                                            | Databases<br>Search Screen<br>- Advanced<br>Search<br>Database -<br>CINAHL Plus<br>with Full Text                                         |     |
| S12 | TI ( (IVR or IVRS) and (interactive or inter-active or voice or record* or respons*) ) OR AB ( (IVR or IVRS) and (interactive or inter-active or voice or record* or respons*) )                                                                                                                                                   | Search modes - Find<br>all my search terms | Interface -<br>EBSCOhost<br>Research<br>Databases<br>Search Screen<br>- Advanced<br>Search<br>Database -<br>CINAHL Plus<br>with Full Text | 290 |
| S11 | TI ( IVR N5 (call* or cellphon* or cell-phon* or dialogue* or mobile# or phon* or record* or smartphon* or smart-phon* or system# or technolog* or telephon*) ) OR AB ( IVR N5 (call* or cellphon* or cell-phon* or dialogue* or mobile# or phon* or record* or smartphon* or smart-phon* or system# or technolog* or telephon*) ) | Search modes - Find<br>all my search terms | Interface -<br>EBSCOhost<br>Research<br>Databases<br>Search Screen<br>- Advanced<br>Search<br>Database -<br>CINAHL Plus<br>with Full Text | 217 |
| S10 | TI "voice response" W0 unit# OR AB "voice response" W0 unit#                                                                                                                                                                                                                                                                       | Search modes - Find<br>all my search terms | Interface -<br>EBSCOhost<br>Research<br>Databases<br>Search Screen<br>- Advanced<br>Search<br>Database -<br>CINAHL Plus<br>with Full Text | 1   |
| S9  | TI ( ((interactive or inter-active) W0 voice respon*) ) OR AB ( ((interactive or inter-active) W0 voice respon*) )                                                                                                                                                                                                                 | Search modes - Find<br>all my search terms | Interface -<br>EBSCOhost<br>Research<br>Databases<br>Search Screen<br>- Advanced                                                          | 629 |

|    |                                                                                                                                                                                                                                                                                                                                                                                                                                                                                                                                                                                                                                                                                                                                                                                              |                                         |                                                                                                                |        |
|----|----------------------------------------------------------------------------------------------------------------------------------------------------------------------------------------------------------------------------------------------------------------------------------------------------------------------------------------------------------------------------------------------------------------------------------------------------------------------------------------------------------------------------------------------------------------------------------------------------------------------------------------------------------------------------------------------------------------------------------------------------------------------------------------------|-----------------------------------------|----------------------------------------------------------------------------------------------------------------|--------|
|    |                                                                                                                                                                                                                                                                                                                                                                                                                                                                                                                                                                                                                                                                                                                                                                                              |                                         | Search Database - CINAHL Plus with Full Text                                                                   |        |
| S8 | TI ( ((interactive or inter-active) W0 voice record*) )<br>OR AB ( (((interactive or inter-active) W0 voice record*) )                                                                                                                                                                                                                                                                                                                                                                                                                                                                                                                                                                                                                                                                       | Search modes - Find all my search terms | Interface - EBSCOhost Research Databases Search Screen - Advanced Search Database - CINAHL Plus with Full Text | 91     |
| S7 | S1 OR S2 OR S3 OR S4 OR S5 OR S6                                                                                                                                                                                                                                                                                                                                                                                                                                                                                                                                                                                                                                                                                                                                                             | Search modes - Find all my search terms | Interface - EBSCOhost Research Databases Search Screen - Advanced Search Database - CINAHL Plus with Full Text | 45,557 |
| S6 | TI ( (smoking or smoker* or tobacco* or nicotine or cigar# or cigarette* or cigarillo# or vape or vaped or vapes or vaping or ecig* or e-cig* or e-vape* or e-vaping or evape* or evaping or snuff or snus or gutka or gutkas or naswar) N5 (curb* or curtail* or decreas* or diminish* or lessen* or limit* or lower* or reduc* or taper* or "cut back" or "cuts back" or "cutting back") ) OR AB ( (smoking or smoker* or tobacco* or nicotine or cigar# or cigarette* or cigarillo# or vape or vaped or vapes or vaping or ecig* or e-cig* or e-vape* or e-vaping or evape* or evaping or snuff or snus or gutka or gutkas or naswar) N5 (curb* or curtail* or decreas* or diminish* or lessen* or limit* or lower* or reduc* or taper* or "cut back" or "cuts back" or "cutting back") ) | Search modes - Find all my search terms | Interface - EBSCOhost Research Databases Search Screen - Advanced Search Database - CINAHL Plus with Full Text | 16,852 |
| S5 | TI ( (smoking or smoker* or tobacco* or nicotine or cigar# or cigarette* or cigarillo# or vape or vaped or vapes or vaping or ecig* or e-cig* or e-vape* or                                                                                                                                                                                                                                                                                                                                                                                                                                                                                                                                                                                                                                  | Search modes - Find all my search terms | Interface - EBSCOhost Research                                                                                 | 25,644 |

|    |                                                                                                                                                                                                                                                                                                                                                                                                                                                                                                                                                                                                                                                                                                                                                                                                    |                                            |                                                                                                                                           |       |
|----|----------------------------------------------------------------------------------------------------------------------------------------------------------------------------------------------------------------------------------------------------------------------------------------------------------------------------------------------------------------------------------------------------------------------------------------------------------------------------------------------------------------------------------------------------------------------------------------------------------------------------------------------------------------------------------------------------------------------------------------------------------------------------------------------------|--------------------------------------------|-------------------------------------------------------------------------------------------------------------------------------------------|-------|
|    | e-vaping or evape* or evaping or snuff or snus or gutka or gutkas or naswar) N5 (abstain* or abstinen* or cease or ceased or ceases or cessation* or dehabituat* or desist* or discontinu* or end or ended or ending or ends or "give up" or "giving up" or "gives up" or "gave up" or halt* or quit* or stop*) ) OR AB ( (smoking or smoker* or tobacco* or nicotine or cigar# or cigarette* or cigarillo# or vape or vaped or vapes or vaping or ecig* or e-cig* or e-vape* or e-vaping or evape* or evaping or snuff or snus or gutka or gutkas or naswar) N5 (abstain* or abstinen* or cease or ceased or ceases or cessation* or dehabituat* or desist* or discontinu* or end or ended or ending or ends or "give up" or "giving up" or "gives up" or "gave up" or halt* or quit* or stop*) ) |                                            | Databases<br>Search Screen<br>- Advanced<br>Search<br>Database -<br>CINAHL Plus<br>with Full Text                                         |       |
| S4 | (MH "Smoking/TH") OR (MH "Vaping/TH")                                                                                                                                                                                                                                                                                                                                                                                                                                                                                                                                                                                                                                                                                                                                                              | Search modes - Find<br>all my search terms | Interface -<br>EBSCOhost<br>Research<br>Databases<br>Search Screen<br>- Advanced<br>Search<br>Database -<br>CINAHL Plus<br>with Full Text | 981   |
| S3 | (MH "Tobacco Use Cessation Products+")                                                                                                                                                                                                                                                                                                                                                                                                                                                                                                                                                                                                                                                                                                                                                             | Search modes - Find<br>all my search terms | Interface -<br>EBSCOhost<br>Research<br>Databases<br>Search Screen<br>- Advanced<br>Search<br>Database -<br>CINAHL Plus<br>with Full Text | 3,979 |
| S2 | (MH "Smoking Cessation Programs")                                                                                                                                                                                                                                                                                                                                                                                                                                                                                                                                                                                                                                                                                                                                                                  | Search modes - Find<br>all my search terms | Interface -<br>EBSCOhost<br>Research<br>Databases<br>Search Screen<br>- Advanced<br>Search                                                | 2,617 |



|    |                          |                                         |                                                                                                                |        |
|----|--------------------------|-----------------------------------------|----------------------------------------------------------------------------------------------------------------|--------|
|    |                          |                                         | Database - CINAHL Plus with Full Text                                                                          |        |
| S1 | (MH "Smoking Cessation") | Search modes - Find all my search terms | Interface - EBSCOhost Research Databases Search Screen - Advanced Search Database - CINAHL Plus with Full Text | 22,734 |

Web of Science

| Set |                                                                                                                                                                                                                                                                                                                                                                                                                                                                                           |         |
|-----|-------------------------------------------------------------------------------------------------------------------------------------------------------------------------------------------------------------------------------------------------------------------------------------------------------------------------------------------------------------------------------------------------------------------------------------------------------------------------------------------|---------|
| #   | Search Query                                                                                                                                                                                                                                                                                                                                                                                                                                                                              | Results |
| 1   | (smoking or smoker* or tobacco* or nicotine or cigar or cigars or cigarette* or cigarillo* or vape or vaped or vapes or vaping or ecig* or e-cig* or e-vape* or e-vaping or evape* or evaping or snuff or snus or gutka or gutkas or naswar) NEAR/5 (abstain* or abstin* or cease or ceased or ceases or cessation* or dehabituat* or desist* or discontinu* or end or ended or ending or ends or "give up" or "giving up" or "gives up" or "gave up" or halt* or quit* or stop*) (Topic) | 53731   |
| 2   | (smoking or smoker* or tobacco* or nicotine or cigar or cigars or cigarette* or cigarillo* or vape or vaped or vapes or vaping or ecig* or e-cig* or e-vape* or e-vaping or evape* or evaping or snuff or snus or gutka or gutkas or naswar) NEAR/5 (curb* or curtail* or decreas* or diminish* or lessen* or limit* or lower* or reduc* or taper* or "cut back" or "cuts back" or "cutting back") (Topic)                                                                                | 49489   |
| 3   | #2 OR #1                                                                                                                                                                                                                                                                                                                                                                                                                                                                                  | 89674   |
| 4   | (interactive or inter-active) NEAR/0 ("voice record" or "voice recorded" or "voice recording" OR "voice recordings" or "voice records") (Topic)                                                                                                                                                                                                                                                                                                                                           | 20      |
| 5   | (interactive or inter-active) NEAR/0 ("voice response" or "voice responses" or "voice respond" or "voice responded" OR "voice responding" or "voice responds") (Topic)                                                                                                                                                                                                                                                                                                                    | 1288    |
| 6   | "voice response unit" or "voice response units" (Topic)                                                                                                                                                                                                                                                                                                                                                                                                                                   | 8       |
| 7   | IVR NEAR/5 (call* or cellphon* or cell-phon* or dialogue* or mobile or mobiles or phon* or record* or smartphon* or smart-                                                                                                                                                                                                                                                                                                                                                                | 716     |

|    |                                                                                                                                                   |       |
|----|---------------------------------------------------------------------------------------------------------------------------------------------------|-------|
|    | phon* or system or systems or technolog* or telephon*) (Topic)                                                                                    |       |
|    | (IVR or IVRS) and (interactive or inter-active or voice or record* or respons*) (Topic)                                                           | 1165  |
| 8  | "AI-IVR" (Topic)                                                                                                                                  | 1     |
|    | (automated or digital* or intelligent or interactive or inter-active or smart or virtual) NEAR/3 (assistant or assistants or PDA or PDAs) (Topic) | 6484  |
| 10 | Alexa or Bixby or Cortana or Siri or "Google Assistant" (Topic)                                                                                   | 4778  |
| 11 | #11 OR #10 OR #9 OR #8 OR #7 OR #6 OR #5 OR #4                                                                                                    | 12886 |
| 12 | #12 AND #3                                                                                                                                        | 101   |

Web of Science

| Set |                                                                                                                                                                                                                                                                                                                                                                                                                                                                                              |         |
|-----|----------------------------------------------------------------------------------------------------------------------------------------------------------------------------------------------------------------------------------------------------------------------------------------------------------------------------------------------------------------------------------------------------------------------------------------------------------------------------------------------|---------|
| #   | Search Query                                                                                                                                                                                                                                                                                                                                                                                                                                                                                 | Results |
|     | (smoking or smoker* or tobacco* or nicotine or cigar or cigars or cigarette* or cigarillo* or vape or vaped or vapes or vaping or ecig* or e-cig* or e-vape* or e-vaping or evape* or evaping or snuff or snus or gutka or gutkas or naswar) NEAR/5 (abstain* or abstinene* or cease or ceased or ceases or cessation* or dehabituat* or desist* or discontinu* or end or ended or ending or ends or "give up" or "giving up" or "gives up" or "gave up" or halt* or quit* or stop*) (Topic) | 53731   |
| 1   | (smoking or smoker* or tobacco* or nicotine or cigar or cigars or cigarette* or cigarillo* or vape or vaped or vapes or vaping or ecig* or e-cig* or e-vape* or e-vaping or evape* or evaping or snuff or snus or gutka or gutkas or naswar) NEAR/5 (curb* or curtail* or decreas* or diminish* or lessen* or limit* or lower* or reduc* or taper* or "cut back" or "cuts back" or "cutting back") (Topic)                                                                                   | 49489   |
| 2   | #2 OR #1                                                                                                                                                                                                                                                                                                                                                                                                                                                                                     | 89674   |
| 3   | (interactive or inter-active) NEAR/0 ("voice record" or "voice recorded" or "voice recording" OR "voice recordings" or "voice records") (Topic)                                                                                                                                                                                                                                                                                                                                              | 20      |
| 4   | (interactive or inter-active) NEAR/0 ("voice response" or "voice responses" or "voice respond" or "voice responded" OR "voice responding" or "voice responds") (Topic)                                                                                                                                                                                                                                                                                                                       | 1288    |
| 5   | "voice response unit" or "voice response units" (Topic)                                                                                                                                                                                                                                                                                                                                                                                                                                      | 8       |
| 6   | IVR NEAR/5 (call* or cellphon* or cell-phon* or dialogue* or mobile or mobiles or phon* or record* or smartphon* or smart-phon* or system or systems or technolog* or telephon*) (Topic)                                                                                                                                                                                                                                                                                                     | 716     |

|    |                                                                                                                                                   |       |
|----|---------------------------------------------------------------------------------------------------------------------------------------------------|-------|
|    | (IVR or IVRS) and (interactive or inter-active or voice or record* or respons*) (Topic)                                                           | 1165  |
| 8  | "AI-IVR" (Topic)                                                                                                                                  | 1     |
| 9  | (automated or digital* or intelligent or interactive or inter-active or smart or virtual) NEAR/3 (assistant or assistants or PDA or PDAs) (Topic) | 6484  |
| 10 | Alexa or Bixby or Cortana or Siri or "Google Assistant" (Topic)                                                                                   | 4778  |
| 11 | #11 OR #10 OR #9 OR #8 OR #7 OR #6 OR #5 OR #4                                                                                                    | 12886 |
| 12 | #12 AND #3                                                                                                                                        | 101   |

## Cochrane Library

Search Name:

Date Run: 04/05/2023 05:20:45

Comment:

| ID  | Search Hits                                                                                                                                                                                                                                                                                                                                                                                                                                                                                           |
|-----|-------------------------------------------------------------------------------------------------------------------------------------------------------------------------------------------------------------------------------------------------------------------------------------------------------------------------------------------------------------------------------------------------------------------------------------------------------------------------------------------------------|
| #1  | [mh "Smoking Cessation"] 5599                                                                                                                                                                                                                                                                                                                                                                                                                                                                         |
| #2  | [mh "Smoking Reduction"] 42                                                                                                                                                                                                                                                                                                                                                                                                                                                                           |
| #3  | [mh "Tobacco Use Cessation"] 156                                                                                                                                                                                                                                                                                                                                                                                                                                                                      |
| #4  | [mh "Smoking Cessation Agents"] 66                                                                                                                                                                                                                                                                                                                                                                                                                                                                    |
| #5  | [mh "Tobacco Use Cessation Devices"] 764                                                                                                                                                                                                                                                                                                                                                                                                                                                              |
| #6  | [mh ^Smoking/TH] 598                                                                                                                                                                                                                                                                                                                                                                                                                                                                                  |
| #7  | [mh "Tobacco Smoking"/TH] 89                                                                                                                                                                                                                                                                                                                                                                                                                                                                          |
| #8  | [mh "Tobacco Use Disorder"/TH] 472                                                                                                                                                                                                                                                                                                                                                                                                                                                                    |
| #9  | [mh Vaping/TH] 3                                                                                                                                                                                                                                                                                                                                                                                                                                                                                      |
| #10 | ((smoking or smoker* or tobacco* or nicotine or cigar or cigars or cigarette* or cigarillo* or vape or vaped or vapes or vaping or ecig* or e-cig* or e-vape* or e-vaping or evape* or evaping or snuff or snus or gutka or gutkas or naswar) NEAR/5 (abstain* or abstinen* or cease or ceased or ceases or cessation* or dehabituat* or desist* or discontinu* or end or ended or ending or ends or "give up" or "giving up" or "gives up" or "gave up" or halt* or quit* or stop*)) :ti,ab,kw 14748 |
| #11 | ((smoking or smoker* or tobacco* or nicotine or cigar or cigars or cigarette* or cigarillo* or vape or vaped or vapes or vaping or ecig* or e-cig* or e-vape* or e-vaping or evape* or evaping or snuff or snus or gutka or gutkas or naswar) NEAR/5 (curb* or curtail* or decreas* or diminish* or lessen* or limit* or lower* or reduc* or taper* or "cut back" or "cuts back" or "cutting back")) :ti,ab,kw 6686                                                                                   |
| #12 | {or #1-#11} 17438                                                                                                                                                                                                                                                                                                                                                                                                                                                                                     |
| #13 | ((interactive or inter-active) NEXT voice record*) :ti,ab,kw 210                                                                                                                                                                                                                                                                                                                                                                                                                                      |
| #14 | ((interactive or inter-active) NEXT voice respon*) :ti,ab,kw 1052                                                                                                                                                                                                                                                                                                                                                                                                                                     |
| #15 | ("voice response" NEXT (unit# or units)) :ti,ab,kw 0                                                                                                                                                                                                                                                                                                                                                                                                                                                  |
| #16 | (IVR NEAR/5 (call* or cellphon* or cell-phon* or dialogue* or mobile* or phon* or record* or smartphon* or smart-phon* or system or systems or technolog* or telephon*)) :ti,ab,kw 276                                                                                                                                                                                                                                                                                                                |
| #17 | ((IVR or IVRS) and (interactive or inter-active or voice or record* or respons*)) :ti,ab,kw 554                                                                                                                                                                                                                                                                                                                                                                                                       |
| #18 | "AI-IVR" :ti,ab,kw 3                                                                                                                                                                                                                                                                                                                                                                                                                                                                                  |
| #19 | ((automated or digital* or intelligent or interactive or inter-active or smart or virtual) NEAR/3 (assistant# or PDA or PDAs)) :ti,ab,kw 231                                                                                                                                                                                                                                                                                                                                                          |
| #20 | (Alexa or Bixby or Cortana or Siri or "Google Assistant") :ti,ab,kw 166                                                                                                                                                                                                                                                                                                                                                                                                                               |
| #21 | [mh "Reminder Systems"] 1108                                                                                                                                                                                                                                                                                                                                                                                                                                                                          |

|     |                                    |      |
|-----|------------------------------------|------|
| #22 | [mh "Speech Recognition Software"] | 30   |
| #23 | {or #13-#22}                       | 2734 |
| #24 | #12 AND #23                        | 112  |

CDSR – 6 reviews  
CENTRAL – 106 trials

Appendix B: Table of Study Characteristics

|                                    | Study information                                                                                                                            | Intervention                                                                                                                                                                                                                                                                                       | Patient characteristics        | Primary Outcomes                                                                                                     | Other outcomes                                                                                      |
|------------------------------------|----------------------------------------------------------------------------------------------------------------------------------------------|----------------------------------------------------------------------------------------------------------------------------------------------------------------------------------------------------------------------------------------------------------------------------------------------------|--------------------------------|----------------------------------------------------------------------------------------------------------------------|-----------------------------------------------------------------------------------------------------|
| Brendryen et al. (2008) Norway     | Study design: Controlled                                                                                                                     | Purpose of IVR: Intervention                                                                                                                                                                                                                                                                       | Population: Adult Smokers      | Reach: 62% of participants answered log-on calls. 87 intervention participants completed treatment.                  | At 1 month, 51% of participants found HE to be “helpful,” and 32% reported HE to be “very helpful”. |
| Trial #: Not reported              | Study setting: Digital/Quitline                                                                                                              | Description of intervention: Happy Ending program is an internet-based multimedia intervention that used CBT techniques to help people quit smoking without the use of nicotine replacement therapies. IVR is an aspect of the intervention, along with website-based activities and SMS messages. | Comparator: Usual care         | Abstinance at follow-up: Repeated point abstinence was 20% for intervention group and 7% for control group (p=0.002) |                                                                                                     |
| Funder: Norwegian Research Council | Inclusion criteria: Wanting to attempt quitting, 18 or older, smoking 5+ cigarettes a day, attempt quit without nicotine replacement therapy | Standalone or adjunct: Adjunct                                                                                                                                                                                                                                                                     | N: 144<br>Control: 146         |                                                                                                                      |                                                                                                     |
| Industry sponsored: No             |                                                                                                                                              | IVR/Follow-up Schedule: Regular IVR                                                                                                                                                                                                                                                                | Age: 39.5<br><br>% female: 50% |                                                                                                                      |                                                                                                     |

|                                            |                                                                                                                                                     |                                                                                                                                                                                                                                                                                                                          |                                  |                                                                                                                                                                                                                                                        |                                                                                                                                                                                                                               |
|--------------------------------------------|-----------------------------------------------------------------------------------------------------------------------------------------------------|--------------------------------------------------------------------------------------------------------------------------------------------------------------------------------------------------------------------------------------------------------------------------------------------------------------------------|----------------------------------|--------------------------------------------------------------------------------------------------------------------------------------------------------------------------------------------------------------------------------------------------------|-------------------------------------------------------------------------------------------------------------------------------------------------------------------------------------------------------------------------------|
|                                            |                                                                                                                                                     | calls depending on participants' needs; follow up at 1, 3, 6 and 12 months                                                                                                                                                                                                                                               |                                  |                                                                                                                                                                                                                                                        |                                                                                                                                                                                                                               |
| Brendryen et al. (2008) Norway             | Study design: Controlled                                                                                                                            | Purpose of IVR: Intervention                                                                                                                                                                                                                                                                                             | Population: Adult Smokers        | Reach: 71% of participants answered log-on calls. 152 participants completed treatment.                                                                                                                                                                | At 1 month, 48.2% found HE to be 'helpful' and 44.7% reported HE to be 'very helpful'.                                                                                                                                        |
| Trial #: Not reported                      | Study setting: Digital/Quitline                                                                                                                     | Description of intervention: Happy Ending program is an internet-based multimedia intervention that used CBT techniques to help people quit smoking. IVR is an aspect of the intervention, along with website-based activities and SMS messages. Participants were given and allowed to use NRT products if they wanted. | Comparator: Usual Care           | Abstinence at follow-up: Repeated point abstinence was significantly higher in treatment group (22.3%) vs. control (13.1%) (p = 0.02. At the 12 month follow up, 74 treatment participants reported abstinence vs. 48 control participants (p = 0.005) | Most participants in both groups opted for NRT therapy (93% intervention vs. 87% control - p = 0.07). At 1 month, the mean number of days of NRT use was significantly higher in treatment group (M = 5.1 vs. 3.9; p = 0.02). |
| Funder: Norwegian Research Council, Pfizer | Inclusion criteria: Wanting to attempt to quit smoking, aged 18+, smoking 10+ cigarettes a day and have access to the internet, email and cellphone | Standalone or adjunct: Adjunct                                                                                                                                                                                                                                                                                           | N: 197<br>Control: 199           |                                                                                                                                                                                                                                                        |                                                                                                                                                                                                                               |
| Industry sponsored: Yes                    |                                                                                                                                                     | IVR/Follow-up Schedule: Regular IVR                                                                                                                                                                                                                                                                                      | Age: 35.9<br><br>% female: 50.8% |                                                                                                                                                                                                                                                        |                                                                                                                                                                                                                               |

|                                             |                                                                                                                                                                                                     |                                                                                                                                                                                                                                                                                                                                   |                                   |                                                                                                                                                  |                                                                                                         |
|---------------------------------------------|-----------------------------------------------------------------------------------------------------------------------------------------------------------------------------------------------------|-----------------------------------------------------------------------------------------------------------------------------------------------------------------------------------------------------------------------------------------------------------------------------------------------------------------------------------|-----------------------------------|--------------------------------------------------------------------------------------------------------------------------------------------------|---------------------------------------------------------------------------------------------------------|
|                                             |                                                                                                                                                                                                     | calls depending on participants' needs; follow up at 1, 3, 6 and 12 months                                                                                                                                                                                                                                                        |                                   |                                                                                                                                                  |                                                                                                         |
| Brown et al. (2021) US                      | Study design: Controlled                                                                                                                                                                            | Purpose of IVR: Follow-up monitoring                                                                                                                                                                                                                                                                                              | Population: Hospitalized Patients | Abstinence at follow-up: 8.9% of intervention reported abstinence vs. 3.5% of control, p=0.01 - verified at 6 months by saliva cotinine analysis | Use of any smoking cessation treatment: 74.6% of intervention vs. 40.5% of control at 6 months, p<0.001 |
| Trial #: NCT02204956                        | Study setting: Acute care private Psychiatric hospital                                                                                                                                              | Description of intervention: Patients received in-patient tobacco cessation counselling. Following discharge, IVR asked about participants' smoking, intentions to quit, desire for an additional 4 weeks of transdermal nicotine patches (ie, 8weeks total), and interest in connecting with free telephone quitline counseling. | Comparator: Usual Care            |                                                                                                                                                  | Use of counselling: 37.3% of intervention vs. 11.0% of control at 6 months, p<0.001                     |
| Funder: National Institute of Mental Health | Inclusion criteria: Inpatient psychiatric patients aged 18 or older who smoked at least 5 cigarettes per day                                                                                        |                                                                                                                                                                                                                                                                                                                                   | N: 174<br>Control: 179            |                                                                                                                                                  | Use of pharmacotherapy: 71.0% vs. 37.0% at 6 months, p<0.001                                            |
| Industry sponsored: No                      | Exclusion: a current diagnosis of non-nicotine substance use disorder, dementia, intellectual disability, autistic spectrum or other cognitive impairment, an inability to provide consent, medical | Standalone or adjunct: Adjunct<br>IVR/Follow-up Schedule: 8 times over                                                                                                                                                                                                                                                            | Age: 36.1<br>% female: 46.7%      |                                                                                                                                                  |                                                                                                         |

|                           |                                                                                            |                                                                                                                                                                                                                                                                                                                |                                                 |                                                                                                                                           |                                                                                                |
|---------------------------|--------------------------------------------------------------------------------------------|----------------------------------------------------------------------------------------------------------------------------------------------------------------------------------------------------------------------------------------------------------------------------------------------------------------|-------------------------------------------------|-------------------------------------------------------------------------------------------------------------------------------------------|------------------------------------------------------------------------------------------------|
|                           | contraindication to the use of NRT or a current pregnancy.                                 | 12 weeks post-discharge                                                                                                                                                                                                                                                                                        |                                                 |                                                                                                                                           |                                                                                                |
| Buchanan et al. (2017) US | Study design: Observational                                                                | Purpose of IVR: Follow-up monitoring and transfer                                                                                                                                                                                                                                                              | Population: Adult perinatal women               | Reach: 35.5% of patients reached by IVR                                                                                                   | 15.4% of IVR + counselling participants used NRT vs. 4% of IVR only                            |
| Funder: MUSC, NIDA        | Study setting: Academic medical center                                                     | Description of intervention: Patients counselled in-hospital by a tobacco treatment specialist; Post-discharge, IVR collected info on smoking status, frequency, quit attempts, motivation to quit, use of nicotine replacement therapy (NRT) and whether the patient wanted to be transferred to the quitline | Comparator: Bedside Cessation Counselling + IVR | Abstinence at follow-up: 12.8% of those who received both counselling and IVR reported abstinence vs. 6.5% of those who received IVR only | 10.8% of IVR + counselling participants were transferred to the quitline vs. 14.0% of IVR only |
| Industry sponsored: No    | Inclusion criteria: Adult women admitted to the peripartum, delivery, and postpartum units |                                                                                                                                                                                                                                                                                                                | N: 421                                          |                                                                                                                                           |                                                                                                |
|                           | Exclusion criteria: Women over 41 and admitted for something non-pregnancy-related         |                                                                                                                                                                                                                                                                                                                | Age: 29                                         |                                                                                                                                           |                                                                                                |
|                           |                                                                                            | Standalone or adjunct: Adjunct                                                                                                                                                                                                                                                                                 | % female: 100%                                  |                                                                                                                                           |                                                                                                |
|                           |                                                                                            | IVR/Follow-up Schedule: 3-, 14-, and 30-days post-discharge                                                                                                                                                                                                                                                    |                                                 |                                                                                                                                           |                                                                                                |



|                                      |                                                                                                                                                  |                                                                                                                                                                                                                                                                                                                                                                                |                                                                                                    |                                                                                                      |  |
|--------------------------------------|--------------------------------------------------------------------------------------------------------------------------------------------------|--------------------------------------------------------------------------------------------------------------------------------------------------------------------------------------------------------------------------------------------------------------------------------------------------------------------------------------------------------------------------------|----------------------------------------------------------------------------------------------------|------------------------------------------------------------------------------------------------------|--|
| Carlini et al.<br>(2012) USA         | Study design:<br>Controlled                                                                                                                      | Purpose of IVR:<br>Intervention                                                                                                                                                                                                                                                                                                                                                | Population:<br>Quitline users                                                                      | Reach: 23.6% of<br>previous quitline<br>users reached                                                |  |
| Trial #:<br>NCT0126059               | Study setting:<br>Quitline                                                                                                                       | Description of<br>intervention: Recruited<br>participants who were<br>previously enrolled in a<br>quitline intervention;<br>IVR call assessed<br>smoking behaviours,<br>current smoking status;<br>if participants were<br>interested in<br>reattempting quit, they<br>were enrolled into<br>connected with quitline<br>specialist and<br>reenrolled into IVR<br>intervention. | Comparator:<br>Usual Care<br><br>N: 245<br>Control: 276<br><br>Age: 42.2<br><br>% female:<br>66.5% | Re-enrollment rate<br>was 28.2% for<br>intervention vs.<br>3.3% for control (p<br>< 0.001)           |  |
| Funder: National<br>Cancer Institute | Inclusion criteria:<br>Previously enrolled<br>in quitline, Medicaid<br>or uninsured, 18 or<br>older, sought help<br>for cigarette/tobacco<br>use | Standalone or adjunct:<br>Standalone                                                                                                                                                                                                                                                                                                                                           |                                                                                                    | IVR participants<br>were 11.2 times<br>more likely to re-<br>enroll than control<br>(OR - p < 0.001) |  |
| Industry<br>sponsored: No            |                                                                                                                                                  | IVR/Follow-up<br>Schedule: One IVR call<br>to assess and/or recruit<br>into intervention. Up to<br>20 call attempts made.                                                                                                                                                                                                                                                      |                                                                                                    |                                                                                                      |  |

|                                                                                                                                                                                                                          |                                                                                                                                                                                                                                                                                                                 |                                                                                                                                                                                                                                                                                                                                                                                                                |                                                                                                                                                      |                                                                                                                                                                                                                           |  |
|--------------------------------------------------------------------------------------------------------------------------------------------------------------------------------------------------------------------------|-----------------------------------------------------------------------------------------------------------------------------------------------------------------------------------------------------------------------------------------------------------------------------------------------------------------|----------------------------------------------------------------------------------------------------------------------------------------------------------------------------------------------------------------------------------------------------------------------------------------------------------------------------------------------------------------------------------------------------------------|------------------------------------------------------------------------------------------------------------------------------------------------------|---------------------------------------------------------------------------------------------------------------------------------------------------------------------------------------------------------------------------|--|
| <p>Carlini et al. (2014) US</p> <p>Trial #:</p> <p>Funder: Quitline Registries for Continuously Engaging Participants in Cessation from the Centers for Disease Control and Prevention</p> <p>Industry sponsored: No</p> | <p>Study design: Controlled</p> <p>Study setting: Quitline</p> <p>Inclusion criteria: 18 or older, having received services in English, providing verbal consent, being a cigarette smoker, not being incarcerated, and not having received quitline services for at least 5 months before the study launch</p> | <p>Purpose of IVR: Intervention</p> <p>Description of intervention: IVR system delivered a set of questions to identify motivational and informational barriers to recycling into a new quit attempt and provided tailored messages to specifically address these barriers</p> <p>Standalone or adjunct: Standalone</p> <p>IVR/Follow-up Schedule: Two cycles of 6 IVR attempts each; follow-up at 90 days</p> | <p>Population: Quitline Users</p> <p>Comparator: Usual Care</p> <p>N: 3,510<br/>Control: 22,824</p> <p>Age: 65.2% over 40</p> <p>% female: 53.8%</p> | <p>Abstinence at follow-up: 24.0% reported abstaining from tobacco in the last 7 days</p> <p>Quit rate: 79.9% of those followed-up with reported making a quit attempted lasting 24 hours or more in the last 90 days</p> |  |
| <p>Cartmell et al. (2018) USA</p> <p>Funder: Agency of Healthcare Research and Quality, Pfizer</p>                                                                                                                       | <p>Study design: Observational</p> <p>Study setting: Hospital</p> <p>Inclusion criteria: 18+ smokers</p>                                                                                                                                                                                                        | <p>Purpose of IVR: Follow-up monitoring and transfer</p> <p>Description of intervention: IVR call at discharge determined</p>                                                                                                                                                                                                                                                                                  | <p>Population: Hospitalized patients</p> <p>Comparator: Usual Care</p> <p>N: 764</p>                                                                 | <p>Cost/Cost-effectiveness: Total mean healthcare cost post-discharge: \$51,937 IVR vs. \$59,132 control, p=0.03.</p>                                                                                                     |  |

|                                                                                                    |                                                                                                                                                             |                                                                                                                                                                                                                                                                                                                                                                               |                                                                        |                                                                                                                                                                                                                                                                                                                                                                 |  |
|----------------------------------------------------------------------------------------------------|-------------------------------------------------------------------------------------------------------------------------------------------------------------|-------------------------------------------------------------------------------------------------------------------------------------------------------------------------------------------------------------------------------------------------------------------------------------------------------------------------------------------------------------------------------|------------------------------------------------------------------------|-----------------------------------------------------------------------------------------------------------------------------------------------------------------------------------------------------------------------------------------------------------------------------------------------------------------------------------------------------------------|--|
| Industry sponsored: Yes                                                                            | <p>admitted to the hospital</p> <p>Exclusion criteria: Those admitted for psychiatric care, same day surgery, &lt;24-hour observation or not discharged</p> | <p>smoking status and referred to the tobacco treatment specialist that assessed patients' behaviour and developed a treatment plan with the patient. IVR also conducts follow-up calls to evaluate smoking status and transfer to counsellor if needed.</p> <p>Standalone or adjunct: Adjunct</p> <p>IVR/Follow-up Schedule: At discharge, 3, 14, 30 days post-discharge</p> | <p>Control: 1439</p> <p>Age: 49.4</p> <p>% female: 47.5%</p>           | <p>Comparing overall health care charges for the TDTS low exposed (IVR) versus unexposed patient groups, mean charges for the IVR group were \$8006 lower than for the control group (P=0.08).</p> <p>Intervention implementation costs were \$34.21 per participant in 12-month period (incl. start-up cost) with total intervention cost being \$158,140.</p> |  |
| <p>Cartmell et al. (2018) USA</p> <p>Funder: Agency of Healthcare Research and Quality, Pfizer</p> | <p>Study design: Observational</p> <p>Study setting: Hospital</p>                                                                                           | <p>Purpose of IVR: Follow-up monitoring and transfer</p> <p>Description of intervention: IVR call at discharge determined</p>                                                                                                                                                                                                                                                 | <p>Population: Hospitalized patients</p> <p>Comparator: Usual Care</p> | <p>Readmission rates: 30-day - 9.8% IVR vs. 11.9% control (p=0.05), 90 day - 17.3% IVR vs. 18.6% control (p = 0.258), 180 day -</p>                                                                                                                                                                                                                             |  |

|                                                                           |                                                                                                                                                                                             |                                                                                                                                                                                                                                                                                                                                                                                                                                  |                                                                                             |                                                                                              |                                                                                                                                          |
|---------------------------------------------------------------------------|---------------------------------------------------------------------------------------------------------------------------------------------------------------------------------------------|----------------------------------------------------------------------------------------------------------------------------------------------------------------------------------------------------------------------------------------------------------------------------------------------------------------------------------------------------------------------------------------------------------------------------------|---------------------------------------------------------------------------------------------|----------------------------------------------------------------------------------------------|------------------------------------------------------------------------------------------------------------------------------------------|
| Industry sponsored: Yes                                                   | <p>Inclusion criteria: 18+ smokers admitted to the hospital</p> <p>Exclusion criteria: Those admitted for psychiatric care, same day surgery, &lt;24-hour observation or not discharged</p> | <p>smoking status and referred to the tobacco treatment specialist that assessed patients' behaviour and developed a treatment plan with the patient. IVR also conducts follow-up calls to evaluate smoking status and transfer to counsellor if needed.</p> <p>Standalone or adjunct: Adjunct</p> <p>IVR/Follow-up Schedule: At discharge, 3, 14, 30 days post-discharge; Follow-up at 30-, 90- and 180-day post-discharge.</p> | <p>N: 764<br/>Control: 1439</p> <p>Age: 49.4</p> <p>% female: 47.5%</p>                     | 22.4% IVR vs. 24.3% control (p=0.239).                                                       |                                                                                                                                          |
| <p>D'Angelo et al. (2022) US</p> <p>Funder: National Cancer Institute</p> | <p>Study design: Observational</p> <p>Study setting: Cancer Centers</p>                                                                                                                     | <p>Purpose of IVR: Intervention</p> <p>Description of intervention: IVR used to automatically identify and contact</p>                                                                                                                                                                                                                                                                                                           | <p>Population: Cancer Patients</p> <p>Comparators: Other smoking cessation intervention</p> | <p>Reach: IVR had the highest average reach with an average of 55.8% of patients reached</p> | <p>21.7% of patients had not smoked in the past 7 days and 18.6% had not smoked in the past 30 days, however, this result applies to</p> |

|                                                                                                                  |                                                                                                                                                                                                                          |                                                                                                                                                                                                                                                 |                                                                                                                                                                         |                                                                                                                                                                                              |                                                                                                             |
|------------------------------------------------------------------------------------------------------------------|--------------------------------------------------------------------------------------------------------------------------------------------------------------------------------------------------------------------------|-------------------------------------------------------------------------------------------------------------------------------------------------------------------------------------------------------------------------------------------------|-------------------------------------------------------------------------------------------------------------------------------------------------------------------------|----------------------------------------------------------------------------------------------------------------------------------------------------------------------------------------------|-------------------------------------------------------------------------------------------------------------|
| Industry sponsored: No                                                                                           | Inclusion criteria: Adults 18 years and older                                                                                                                                                                            | patients who smoked to provide treatment. Implemented in 4/38 cancer centers.<br><br>Standalone or adjunct: Unclear<br><br>IVR/Follow-up Schedule: Not reported                                                                                 | including telephone counselling, in-person counselling, cessation medication and access to a quitline.<br><br>N: 38 Cancer centers<br><br>Age: N/A<br><br>% female: N/A |                                                                                                                                                                                              | all cancer centers, across all implemented interventions and is not specific to IVR.                        |
| Ershoff et al. (1999) USA<br><br>Trial #: Not reported<br><br>Funder: Not reported<br><br>Industry sponsored: No | Study design: Controlled<br><br>Study setting: Hospital<br><br>Exclusion criteria: Women under the age of 18, and those who began prenatal care past the 26th week of pregnancy, smoked less than 7 cigarettes week pre- | Purpose of IVR: Intervention<br><br>Description of intervention: For the IVR subgroup, participants were given informational booklet along with access to computerized IVR support system that they had access to 24/7 toll-free. IVR would ask | Population: Adults Perinatal women<br><br>Comparators: Cessation booklet, Motivational Interviewing<br><br>N: 120<br>Control: 111<br><br>Age: 29.6                      | Reach: 285 participants successfully reached for follow-up at the 34th week of pregnancy (IVR only group not specified)<br><br>Quit rate: 16.7% of IVR intervention group were biochemically | Only 20.8% of IVR patients placed one or more calls to the system and it had no impact on their quit status |

|                                                                                                                                            |                                                                                                                                                         |                                                                                                                                                                                                                                                                                                               |                                                                                                              |                                                                                                                                                                    |                                                                                                                                                       |
|--------------------------------------------------------------------------------------------------------------------------------------------|---------------------------------------------------------------------------------------------------------------------------------------------------------|---------------------------------------------------------------------------------------------------------------------------------------------------------------------------------------------------------------------------------------------------------------------------------------------------------------|--------------------------------------------------------------------------------------------------------------|--------------------------------------------------------------------------------------------------------------------------------------------------------------------|-------------------------------------------------------------------------------------------------------------------------------------------------------|
|                                                                                                                                            | pregnancy, had experienced a miscarriage/abortion, and had not smoked prior to the baseline interview                                                   | about smoking behaviour and readiness to change as well as stage-appropriate, customized motivational messages, interactive activities and reinforcement. Standalone or adjunct: Adjunct<br><br>IVR/Follow-up Schedule: Available 24/7 for participants to utilize as needed; Follow-up at 32 weeks pregnancy | % female: 100%                                                                                               | confirmed end-of-pregnancy quitters - not statistically significant                                                                                                |                                                                                                                                                       |
| Fellows et al. (2016) US<br><br>Trial #:<br>NCT01236079<br>Funder: National Heart, Lung, and Blood Institute<br><br>Industry sponsored: No | Study design: Controlled<br><br>Study setting: Hospitals<br><br>Inclusion criteria: Adult patients admitted to one of the hospitals who reported having | Purpose of IVR: Intervention<br><br>Description of intervention: Patients were counselled in-hospital and created a tailored discharge treatment recommendation; medications; IVR                                                                                                                             | Population: Hospitalized patients<br><br>Comparator: Usual Care<br><br>N: 597<br>Control: 301<br><br>Age: 53 | Reach: 50.6% of patients completed call 1, 31.3% completed call 4; mean total calls completed = 2 (SD 1.7)<br><br>Abstinence at follow-up: 30-day abstinence = 18% | Use of any quit program: 8.4% in intervention, 5.0% in control, p=0.096<br><br>Use of telephone quitline: 6.9% intervention vs. 2.5% control, p=0.014 |

|                                                                                                        |                                                                                                                                                                                                                                                                                                                                                                                                  |                                                                                                                                                                                                                                                                    |                                                                                        |                                                                                              |                                                                                                                                                             |
|--------------------------------------------------------------------------------------------------------|--------------------------------------------------------------------------------------------------------------------------------------------------------------------------------------------------------------------------------------------------------------------------------------------------------------------------------------------------------------------------------------------------|--------------------------------------------------------------------------------------------------------------------------------------------------------------------------------------------------------------------------------------------------------------------|----------------------------------------------------------------------------------------|----------------------------------------------------------------------------------------------|-------------------------------------------------------------------------------------------------------------------------------------------------------------|
|                                                                                                        | <p>smoked a cigarette in the previous 30 days, spoke English, had a working phone, and were interested in remaining abstinent post-discharge</p> <p>Exclusion criteria: Patients living more than 50 miles away, admitted to a critical care, labor/delivery, or psychiatric unit, were pregnant or breastfeeding, were physically too ill or cognitively unable to provide informed consent</p> | <p>contacted patients for smoking status, cessation program enrollment status, and cessation medication use, and received tips for quitting</p> <p>Standalone or adjunct: Adjunct</p> <p>IVR/Follow-up Schedule: 4, 14, 28, and 49 days; Follow-up at 6 months</p> | % female: 56.6%                                                                        | for intervention, 17% for control, p=0.569                                                   | Use of any medication: 47.9% intervention vs. 38.0% control, p=0.013                                                                                        |
| <p>Mahoney et al. (2018) USA</p> <p>Funder: Western New York Cancer Coalition Center, Roswell Park</p> | <p>Study design: Observational</p> <p>Study setting: Telephone</p> <p>Inclusion criteria: 18 years or older,</p>                                                                                                                                                                                                                                                                                 | <p>Purpose of IVR: Intervention, transfer</p> <p>Description of intervention: Looks at AVR system (same as IVR). Following chart review of smokers in</p>                                                                                                          | <p>Population: Adult Smokers</p> <p>Comparator: Usual Care</p> <p>N: 1049 (opt-in)</p> | Reach: 32% of patients reached following chart review, 55% of these opted in to AVR program. | Females (OR = 0.78, CI 0.65-0.95) and those over 40 were less likely to opt out, while rural smokers (OR = 3.84, CI 3.01-3.90) were more likely to opt out. |

|                                                                                      |                                                                                                                                                          |                                                                                                                                                                                                                                                                                                                                                                                                                                                        |                                                                         |                                                                                                       |                                                                                                                                                                         |
|--------------------------------------------------------------------------------------|----------------------------------------------------------------------------------------------------------------------------------------------------------|--------------------------------------------------------------------------------------------------------------------------------------------------------------------------------------------------------------------------------------------------------------------------------------------------------------------------------------------------------------------------------------------------------------------------------------------------------|-------------------------------------------------------------------------|-------------------------------------------------------------------------------------------------------|-------------------------------------------------------------------------------------------------------------------------------------------------------------------------|
| Comprehensive Cancer Center, National Cancer Institute<br><br>Industry sponsored: No | visited an urban/rural primary care office community health center, academic site or private practice in a medically underserved communities of interest | area, baseline AVR call was made to all eligible patients. Opt-in participants received AVR calls every day. AVR customized motivational messages, activities and questions during call to specific stage of change. If participant relapsed, they were transferred to primary care office or state quitline for counselling.<br><br>Standalone or adjunct: Standalone<br><br>IVR/Follow-up Schedule: IVR calls every day for study period (undefined) | Control: 850 (opt-out)<br><br>Age: 59.1% over 50<br><br>% female: 51.9% | Abstinence at follow-up: 30% of intervention group that completed the AVR program reported abstinence | Smokers from rural medical offices were more likely to report being smoke free (OR, 1.41, CI 1.01-1.97) - smoke free status did not differ by sex, racial group or age. |
| McDaniel et al. (2015) US<br><br>Trial #: NCT0088899                                 | Study design: Controlled<br><br>Study setting: QFL program                                                                                               | Purpose of IVR: Risk Assessment<br><br>Description of intervention: All participants received                                                                                                                                                                                                                                                                                                                                                          | Population: Quitline users<br><br>Comparators: Standard                 | Abstinence at follow-up: At 6 months: No smoking in last 7 days = 66.0% of control, 69.6% of          | 98% were satisfied, 98% would recommend the programme to others; overall, 87% said IVR was helpful                                                                      |



|                                                                      |                                                                                                                                                                                                                                                                                                                                                                                                    |                                                                                                                                                                                                                                                                                                                                                                       |                                                                                                                                      |                                                                                                                                                                                                                                                                                                                                                                                                                |  |
|----------------------------------------------------------------------|----------------------------------------------------------------------------------------------------------------------------------------------------------------------------------------------------------------------------------------------------------------------------------------------------------------------------------------------------------------------------------------------------|-----------------------------------------------------------------------------------------------------------------------------------------------------------------------------------------------------------------------------------------------------------------------------------------------------------------------------------------------------------------------|--------------------------------------------------------------------------------------------------------------------------------------|----------------------------------------------------------------------------------------------------------------------------------------------------------------------------------------------------------------------------------------------------------------------------------------------------------------------------------------------------------------------------------------------------------------|--|
| Funder: National Institutes for Health<br><br>Industry sponsored: No | <p>Inclusion criteria: Tobacco users enrolled in the Quit For Life (QFL) programme who were quit for 24 hours or more, English-speaking, 18 or older, having access to a touch-tone phone</p> <p>Exclusion criteria: Smokeless tobacco users, actively participating in another tobacco cessation programme, had previously enrolled in QFL during the past 6 months, had limited phone access</p> | <p>five counselling calls from a Quit Coach; IVR calls delivered risk assessments, and high-risk participants were transferred to a Quit Coach</p> <p>Standalone or adjunct: Adjunct</p> <p>IVR/Follow-up Schedule: TEQ-10 = twice weekly for 2 weeks, then weekly for 6 weeks; TEQ-20 = daily for 2 weeks, then weekly for 6 weeks; follow-up at 6 and 12 months</p> | <p>quitline uses, TEQ-10, TEQ-20</p> <p>N: 602 in TEQ-10, 591 in TEQ-20<br/>Control: 592</p> <p>Age: 43.4</p> <p>% female: 54.2%</p> | <p>TEQ-10 (p=0.3051 vs. control), 67.3% of TEQ-20 (p=0.7121 vs. control); Did not smoke in the last 30 days = 60.6% of control, 65.2% of TEQ-10 (p=0.1946), 61.1% of TEQ-20 (p=0.8947);</p> <p>At 12 months: No smoking in last 7 days = 65.3% of control, 67.0% of TEQ-10 (p=1691), 62.2% of TEQ-20 (p=0.4655); in last 30 days: 61.6% of control, 63.1% of TEQ-10 (p=0.6821), 56.6% of TEQ-20 (p=0.1871)</p> |  |
| McNaughton et al. (2013) Canada                                      | Study design: Controlled                                                                                                                                                                                                                                                                                                                                                                           | Purpose of IVR: Intervention                                                                                                                                                                                                                                                                                                                                          | Population: Adult Smokers                                                                                                            | Abstinence at follow-up: Of patients who had quit smoking at 12                                                                                                                                                                                                                                                                                                                                                |  |

|                                                                                                  |                                                                                                                                                                                                                                                                                                                                                                                                                                                                                                                      |                                                                                                                                                                                                                                                                                                                                                                                                                                                                                                                                                                                                     |                                                                                                                                                                                                            |                                                                                                                                                                                                                                                                                                                                                                                                                                                                                        |  |
|--------------------------------------------------------------------------------------------------|----------------------------------------------------------------------------------------------------------------------------------------------------------------------------------------------------------------------------------------------------------------------------------------------------------------------------------------------------------------------------------------------------------------------------------------------------------------------------------------------------------------------|-----------------------------------------------------------------------------------------------------------------------------------------------------------------------------------------------------------------------------------------------------------------------------------------------------------------------------------------------------------------------------------------------------------------------------------------------------------------------------------------------------------------------------------------------------------------------------------------------------|------------------------------------------------------------------------------------------------------------------------------------------------------------------------------------------------------------|----------------------------------------------------------------------------------------------------------------------------------------------------------------------------------------------------------------------------------------------------------------------------------------------------------------------------------------------------------------------------------------------------------------------------------------------------------------------------------------|--|
| <p>Trial #:<br/>NCT00832806<br/>Funder: Pfizer<br/>Canada</p> <p>Industry<br/>sponsored: Yes</p> | <p>Study setting:<br/>Outpatient Clinic</p> <p>Inclusion criteria:<br/>Smoking ≥35<br/>cigarettes per week<br/>or ≥5 cigarettes per<br/>day for at least 2<br/>years with no period<br/>of abstinence longer<br/>than 3 months</p> <p>Exclusion criteria:<br/>Use of any smoking<br/>cessation drugs or<br/>nicotine replacement<br/>in the last 3 months,<br/>use of medications<br/>to treat depression<br/>or any psychiatric<br/>illness, history of<br/>depression or an<br/>unstable medical<br/>condition</p> | <p>Description of<br/>intervention: All<br/>participants received a<br/>12-week supply of<br/>varenicline; IVR asked<br/>about cigarette use,<br/>side effects, confidence<br/>in maintaining<br/>abstinence, and<br/>motivational messages;<br/>at 12 weeks, all<br/>participants who were<br/>still abstinent were<br/>randomized to receive<br/>either further IVR or no<br/>IVR</p> <p>Standalone or adjunct:<br/>Adjunct</p> <p>IVR/Follow-up<br/>Schedule: Days 1, 3, 8<br/>and 11 post-quit then<br/>every 2 weeks for<br/>following 39 weeks;<br/>follow-up at 52 weeks<br/>and 2 years</p> | <p>Comparator:<br/>Participants<br/>who only<br/>received IVR for<br/>12 weeks.</p> <p>N: 101 initially<br/>and then 44 IVR<br/>only<br/>Control: 41</p> <p>Age: 52.6<br/>overall</p> <p>% female: 33%</p> | <p>weeks, 59% were<br/>smoke-free at 52<br/>weeks, 52% of<br/>intervention and<br/>66.7% of control<br/>(p=0.33)</p> <p>At two years, 13%<br/>of overall<br/>population, 30% of<br/>those abstinent at<br/>12 weeks, and 53%<br/>of those abstinent<br/>at 52 weeks (n=40)<br/>were confirmed to<br/>be non-smokers; of<br/>these, 21% had<br/>received extended<br/>IVR (so 21.7% of<br/>intervention vs.<br/>42.9% of control,<br/>p=0.13, were<br/>smoke-free at two<br/>years)</p> |  |
|--------------------------------------------------------------------------------------------------|----------------------------------------------------------------------------------------------------------------------------------------------------------------------------------------------------------------------------------------------------------------------------------------------------------------------------------------------------------------------------------------------------------------------------------------------------------------------------------------------------------------------|-----------------------------------------------------------------------------------------------------------------------------------------------------------------------------------------------------------------------------------------------------------------------------------------------------------------------------------------------------------------------------------------------------------------------------------------------------------------------------------------------------------------------------------------------------------------------------------------------------|------------------------------------------------------------------------------------------------------------------------------------------------------------------------------------------------------------|----------------------------------------------------------------------------------------------------------------------------------------------------------------------------------------------------------------------------------------------------------------------------------------------------------------------------------------------------------------------------------------------------------------------------------------------------------------------------------------|--|

|                                                                                                                        |                                                                                                                                                                                                                                                                                  |                                                                                                                                                                                                                                                                                                                                                                                                                                                                                  |                                                                                                                                                                     |                                                                                                                                                                                                                                                                                                                  |                                                                                                                                                                                                                                                                                        |
|------------------------------------------------------------------------------------------------------------------------|----------------------------------------------------------------------------------------------------------------------------------------------------------------------------------------------------------------------------------------------------------------------------------|----------------------------------------------------------------------------------------------------------------------------------------------------------------------------------------------------------------------------------------------------------------------------------------------------------------------------------------------------------------------------------------------------------------------------------------------------------------------------------|---------------------------------------------------------------------------------------------------------------------------------------------------------------------|------------------------------------------------------------------------------------------------------------------------------------------------------------------------------------------------------------------------------------------------------------------------------------------------------------------|----------------------------------------------------------------------------------------------------------------------------------------------------------------------------------------------------------------------------------------------------------------------------------------|
| <p>Nahas et al. (2016) US</p> <p>Funder: Medical University of South Carolina Health</p> <p>Industry sponsored: No</p> | <p>Study design: Observational</p> <p>Study setting: Medical University</p> <p>Inclusion criteria: Adult cigarette smokers</p> <p>Exclusion criteria: Patients who died during hospitalization, receiving hospice care, not discharged back home, and psychiatric inpatients</p> | <p>Purpose of IVR: Follow-up monitoring and transfer</p> <p>Description of intervention: Patients counselled in-hospital by tobacco treatment specialist and developed an individualized tobacco-treatment plan; IVR collected info on smoking status and provide additional support through the offer of a direct immediate referral “warm transfer” to a quitline</p> <p>Standalone or adjunct: Adjunct</p> <p>IVR/Follow-up Schedule: 3-, 14-, and 30-days post-discharge</p> | <p>Population: Hospitalized Patients</p> <p>Comparator: Bedside Counselling + IVR</p> <p>N: Not reported</p> <p>Age: Not reported</p> <p>% female: Not reported</p> | <p>Reach: 42.8% were reached at least once within 30 days</p> <p>Abstinence at follow-up: 36.4% of those who were reached reported not smoking at the time of their last phone contact; based on intent-to-treat, 13.5% of patients were classified as not smoking based on their most recent follow-up call</p> | <p>19.6% who were reached asked to be transferred to the quitline</p> <p>Bedside counselling was associated with a 13% increase in response to IVR (55% vs. 49%), a 90% increase in reported abstinence (51% vs. 27%), and double the rate of those using medications (21% vs. 8%)</p> |
|------------------------------------------------------------------------------------------------------------------------|----------------------------------------------------------------------------------------------------------------------------------------------------------------------------------------------------------------------------------------------------------------------------------|----------------------------------------------------------------------------------------------------------------------------------------------------------------------------------------------------------------------------------------------------------------------------------------------------------------------------------------------------------------------------------------------------------------------------------------------------------------------------------|---------------------------------------------------------------------------------------------------------------------------------------------------------------------|------------------------------------------------------------------------------------------------------------------------------------------------------------------------------------------------------------------------------------------------------------------------------------------------------------------|----------------------------------------------------------------------------------------------------------------------------------------------------------------------------------------------------------------------------------------------------------------------------------------|

|                                                         |                                                                                                                      |                                                                                                                                                                                                                                                                                                                                                                                                                                                   |                                      |                                                                                                                                   |  |
|---------------------------------------------------------|----------------------------------------------------------------------------------------------------------------------|---------------------------------------------------------------------------------------------------------------------------------------------------------------------------------------------------------------------------------------------------------------------------------------------------------------------------------------------------------------------------------------------------------------------------------------------------|--------------------------------------|-----------------------------------------------------------------------------------------------------------------------------------|--|
| Reid et al. (2007)<br>Canada                            | Study design:<br>Controlled                                                                                          | Purpose of IVR: Follow-up monitoring and risk assessment                                                                                                                                                                                                                                                                                                                                                                                          | Population:<br>Hospitalized patients | Reach: At 3-day follow-up, 70 participants answered IVR calls                                                                     |  |
| Trial #: Not reported                                   | Study setting:<br>Hospital                                                                                           | Description of intervention: IVR system called participants post-discharge and asked about smoking status, confidence in staying smoke free until next call, and use of self-help materials and pharmacotherapies. Patients were flagged and connected with nurse specialists if they reported relapse but interest in quit reattempt or if they were not confident in their ability to stay smoke free. Further telephone counselling was given. | Comparator:<br>Usual Care            | Abstinence at follow-up: At the 52-week follow-up, 46% of the IVR group and 34.7% of the control group were abstinent (p = 0.07). |  |
| Funder:<br>Canadian Tobacco Control Research Initiative | Inclusion criteria:<br>Current smokers (5 or more cigarettes per day), 18+, hospitalized for acute coronary syndrome |                                                                                                                                                                                                                                                                                                                                                                                                                                                   | N: 50<br>Control: 50                 |                                                                                                                                   |  |
| Industry sponsored: No                                  |                                                                                                                      | Standalone or adjunct:<br>Standalone                                                                                                                                                                                                                                                                                                                                                                                                              | Age: 54<br><br>% female: 39%         |                                                                                                                                   |  |

|                                                                                             |                                                                                                                                                                                                                                                        |                                                                                                                                                                                                                                                                                                                                                                                                                                                      |                                         |                                                                                                                                                                                                  |                                                                                                                                                                                 |
|---------------------------------------------------------------------------------------------|--------------------------------------------------------------------------------------------------------------------------------------------------------------------------------------------------------------------------------------------------------|------------------------------------------------------------------------------------------------------------------------------------------------------------------------------------------------------------------------------------------------------------------------------------------------------------------------------------------------------------------------------------------------------------------------------------------------------|-----------------------------------------|--------------------------------------------------------------------------------------------------------------------------------------------------------------------------------------------------|---------------------------------------------------------------------------------------------------------------------------------------------------------------------------------|
|                                                                                             |                                                                                                                                                                                                                                                        | IVR/Follow-up<br>Schedule: 3-, 14- and<br>30-days post-discharge;<br>12- and 52-weeks post-<br>discharge (by<br>telephone, not IVR)                                                                                                                                                                                                                                                                                                                  |                                         |                                                                                                                                                                                                  |                                                                                                                                                                                 |
| Rigotti et al.<br>(2014) US                                                                 | Study design:<br>Controlled                                                                                                                                                                                                                            | Purpose of IVR:<br>Intervention                                                                                                                                                                                                                                                                                                                                                                                                                      | Population:<br>Hospitalized<br>patients | Abstinence at<br>follow-up:<br>Biochemically<br>confirmed<br>abstinence for past<br>7 days = 25.8% of<br>intervention, 15.1%<br>of control, p=0.009                                              | Any smoking<br>cessation use: at 1<br>month = 82.8% of<br>intervention, 62.8%<br>of control, p<0.001;<br>at 6 months = 89.9%<br>of intervention,<br>80.4% of control,<br>p=0.01 |
| Trial #:<br>NCT01177176                                                                     | Study setting:<br>Hospital                                                                                                                                                                                                                             | Description of<br>intervention:<br>Participants give a 30-<br>day supply of tobacco<br>cessation medication,<br>refillable for up to 90<br>days of treatment; 5<br>IVR calls provided<br>advice and support<br>messages that<br>prompted smokers to<br>stay quit, encouraged<br>proper use and<br>adherence to cessation<br>medication, offered<br>medication refills, and<br>triaged smokers to a<br>return telephone call<br>from a live counselor | Comparator:<br>Usual Care               | Self-reported<br>abstinence in past<br>7 days: At 1 month<br>= 52.0% of<br>intervention, 39.2%<br>of control, p=0.01;<br>at 6 months =<br>40.9% of<br>intervention, 28.1%<br>of control, p=0.008 |                                                                                                                                                                                 |
| Funder: National<br>Institutes of<br>Health/National<br>Heart, Lung, and<br>Blood Institute | Inclusion criteria: 18<br>or older, smoked $\geq 1$<br>cigarette/day during<br>the month before<br>admission, received<br>smoking cessation<br>counseling in the<br>hospital, stated that<br>they planned to try<br>to quit smoking after<br>discharge |                                                                                                                                                                                                                                                                                                                                                                                                                                                      | N: 198<br>Control: 199                  | Abstinent since<br>hospital discharge:                                                                                                                                                           |                                                                                                                                                                                 |
| Industry<br>sponsored: No                                                                   | Exclusion criteria:<br>Expected hospital<br>stay of <24 hours,<br>substance use in the                                                                                                                                                                 |                                                                                                                                                                                                                                                                                                                                                                                                                                                      | Age: 53.9<br><br>% female:<br>48.5%     |                                                                                                                                                                                                  |                                                                                                                                                                                 |

|                                                     |                                                                                                                                                                                                                                                  |                                                                                                                       |                                                               |                                                                                                                                                                                                                                                                                                                                                                                                      |                                                                                      |
|-----------------------------------------------------|--------------------------------------------------------------------------------------------------------------------------------------------------------------------------------------------------------------------------------------------------|-----------------------------------------------------------------------------------------------------------------------|---------------------------------------------------------------|------------------------------------------------------------------------------------------------------------------------------------------------------------------------------------------------------------------------------------------------------------------------------------------------------------------------------------------------------------------------------------------------------|--------------------------------------------------------------------------------------|
|                                                     | past 12 months other than tobacco, alcohol, or marijuana, admitted for an alcohol or drug overdose, could not consent or participate in counselling, admitted to obstetric or psychiatric units, life expectancy <12 months, medical instability | Standalone or adjunct:<br>Adjunct<br><br>IVR/Follow-up<br>Schedule: 2, 14, 30, 60, and 90 days; follow-up at 6 months |                                                               | at 1 month = 46.0% of intervention, 33.2% of control, $p<0.01$ ; at 6 months = 27.3% of intervention, 16.1% of control, $p=0.007$<br><br>Reducing costs:<br>Hospital cost per quit: = \$4,910 in year 1, \$2,670 in subsequent years<br><br>Incremental per-patient costs: \$540 in year 1, \$294 in subsequent years (year 1 costs were primarily for building the phone system and training staff) |                                                                                      |
| Rigotti et al. (2016) US<br><br>Trial #: NCT0171432 | Study design:<br>Controlled<br><br>Study setting:<br>Hospitals                                                                                                                                                                                   | Purpose of IVR:<br>Intervention<br><br>Description of intervention:<br>Intervention patients                          | Population:<br>Adult smokers<br><br>Comparator:<br>Usual Care | Reach: Intervention participants answered (62%) of IVR calls; median = 3 of 5 planned calls per person                                                                                                                                                                                                                                                                                               | 59% requested transfer to a Quit Coach<br><br>Any use of smoking-cessation treatment |

|                                                                |                                                                                                                                                                                                                                                                                                                                                                                                                                                                                                    |                                                                                                                                                                                                                                                                                                                                                                                                                                                                                             |                                                                            |                                                                                                                                                                                                                                                                                                                                                                                                                                                                                                                              |                                                                                      |
|----------------------------------------------------------------|----------------------------------------------------------------------------------------------------------------------------------------------------------------------------------------------------------------------------------------------------------------------------------------------------------------------------------------------------------------------------------------------------------------------------------------------------------------------------------------------------|---------------------------------------------------------------------------------------------------------------------------------------------------------------------------------------------------------------------------------------------------------------------------------------------------------------------------------------------------------------------------------------------------------------------------------------------------------------------------------------------|----------------------------------------------------------------------------|------------------------------------------------------------------------------------------------------------------------------------------------------------------------------------------------------------------------------------------------------------------------------------------------------------------------------------------------------------------------------------------------------------------------------------------------------------------------------------------------------------------------------|--------------------------------------------------------------------------------------|
| <p>Funder:<br/>NIH/NHLBI</p> <p>Industry<br/>sponsored: No</p> | <p>Inclusion criteria:<br/>Adults 18 or older who smoke one or more cigarettes daily, had &gt;5 minutes of smoking cessation counselling in the hospital, stated they planned to try to quit smoking post-discharge</p> <p>Exclusion criteria:<br/>Had no telephone, could not give informed consent or participate in counselling, were admitted to obstetric or psychiatric units, were admitted for IV drug overdose, had medical instability, had &lt;1 year of estimated life expectancy.</p> | <p>receive a 30-day supply of free FDA-approved tobacco cessation medication, refillable for up to 90 days of treatment; IVR calls prompted smokers to quit or stay quit, offered support messages, encouraged adherence to cessation medication, and offered smokers the option of a direct two-step transfer to a telephone quitline</p> <p>Standalone or adjunct:<br/>Adjunct</p> <p>IVR/Follow-up<br/>Schedule: 2, 12-, 28-, 58-, and 88-days post-discharge; follow-up at 6 months</p> | <p>N: 680<br/>Control: 677</p> <p>Age: 49.6</p> <p>% female:<br/>48.8%</p> | <p>Abstinence at follow-up:<br/>Abstinent for past 7 days, at 1 month = 43.4%<br/>intervention, 32.1% control, <math>p&lt;0.0001</math>;<br/>at 6 months: 30.7% intervention, 26.6% control, <math>p&lt;0.10</math>;<br/>abstinent since hospital discharge, at 1 month: 31.0% intervention, 26.4% control, <math>p&lt;0.10</math>; at 6 months: 17.8% intervention, 14.9% control, not significant</p> <p>Quit rate:<br/>Biochemically confirmed tobacco abstinence immediately post-discharge = 16.6% of intervention,</p> | <p>at 6 months: 85.3% of intervention, 66.2% of control, <math>p&lt;0.001</math></p> |
|----------------------------------------------------------------|----------------------------------------------------------------------------------------------------------------------------------------------------------------------------------------------------------------------------------------------------------------------------------------------------------------------------------------------------------------------------------------------------------------------------------------------------------------------------------------------------|---------------------------------------------------------------------------------------------------------------------------------------------------------------------------------------------------------------------------------------------------------------------------------------------------------------------------------------------------------------------------------------------------------------------------------------------------------------------------------------------|----------------------------------------------------------------------------|------------------------------------------------------------------------------------------------------------------------------------------------------------------------------------------------------------------------------------------------------------------------------------------------------------------------------------------------------------------------------------------------------------------------------------------------------------------------------------------------------------------------------|--------------------------------------------------------------------------------------|

|                                      |                                              |                                                                                                                                                                                          |                             |                                                                                                                                                                                         |                                                                                                                                                                                         |
|--------------------------------------|----------------------------------------------|------------------------------------------------------------------------------------------------------------------------------------------------------------------------------------------|-----------------------------|-----------------------------------------------------------------------------------------------------------------------------------------------------------------------------------------|-----------------------------------------------------------------------------------------------------------------------------------------------------------------------------------------|
|                                      |                                              |                                                                                                                                                                                          |                             | 15.5% of control, not significant                                                                                                                                                       |                                                                                                                                                                                         |
| Schneider et al. (1995) USA          | Study design: Observational                  | Purpose of IVR: Intervention                                                                                                                                                             | Population: Adult Smokers   | Reach: 610 called program at least once, 571 were included in the final analysis. Of these 473 participants made 2 or more calls and 262 participants made 5 or more calls.             | Those who used IVR more often were more likely to remain abstinent at 6 month follow up (m = 17.67 calls vs. 7.65 calls; p < .001). Similar results found at 1- and 3-month follow-ups. |
| Funder: National Institute of Health | Study setting: Telephone                     | Description of intervention: Early IVR system monitored participants progress, provided motivation, helpful techniques and coping mechanisms and interactive activities (smoking diary). | Comparator: Self-Comparison | Abstinance at follow-up: Of those that reported abstinance at 1 month follow-up, 47.1% were still abstinent at 3-month follow-up and 37.3% were abstinent at 3- and 6-month follow-ups. |                                                                                                                                                                                         |
| Industry sponsored: No               | Inclusion criteria: 18 or older, smoke daily | Standalone or adjunct: Standalone                                                                                                                                                        | N: 571                      |                                                                                                                                                                                         |                                                                                                                                                                                         |
|                                      |                                              | IVR/Follow-up Schedule: Participants called as needed following the initiation call; follow-up at 1, 3 and 6 months after initiation call (letter and post-card for data collection)     | Age: Not reported           |                                                                                                                                                                                         |                                                                                                                                                                                         |
|                                      |                                              |                                                                                                                                                                                          | % female: Not reported      |                                                                                                                                                                                         |                                                                                                                                                                                         |



|                              |                                                          |                                                                                                                                                                                                                                                                                                                                |                                                                                                                                          |                                                                                                                                                                                                                               |  |
|------------------------------|----------------------------------------------------------|--------------------------------------------------------------------------------------------------------------------------------------------------------------------------------------------------------------------------------------------------------------------------------------------------------------------------------|------------------------------------------------------------------------------------------------------------------------------------------|-------------------------------------------------------------------------------------------------------------------------------------------------------------------------------------------------------------------------------|--|
| Velicer et al.<br>(2006) USA | Study design:<br>Controlled                              | Purpose of IVR:<br>Intervention                                                                                                                                                                                                                                                                                                | Population:<br>Veteran<br>Smokers                                                                                                        | Reach: 30% of<br>participants used<br>IVR multiple times,<br>30% used it once<br>and 40% did not<br>use it at all.                                                                                                            |  |
| Trial #: Not<br>reported     | Study setting:<br>Telephone                              | Description of<br>intervention: IVR was<br>used in conjunction<br>with a manual, expert<br>system feedback report<br>and NRT. With the<br>addition of IVR, calls<br>were made on a<br>schedule depending on<br>NRT acceptance. IVR<br>system asked questions<br>and provided support<br>according to<br>participant responses. | Comparators:<br>Cessation<br>booklet,<br>Cessation<br>booklet + NRT,<br>Cessation<br>booklet + NRT +<br>expert system<br>feedback report | Abstinence at<br>follow-up: The 6-<br>month prolonged<br>abstinence rate at<br>month 10 = 6.6% of<br>intervention group,<br>at month 20 = 9.3%<br>of intervention<br>group and at<br>month 30 = 15% of<br>intervention group. |  |
| Funder: Not<br>reported      | Inclusion criteria:<br>Regularly smoke 10+<br>cigs a day | Standalone or adjunct:<br>Adjunct                                                                                                                                                                                                                                                                                              | N: 500<br>Control: 523                                                                                                                   |                                                                                                                                                                                                                               |  |
| Industry<br>sponsored: No    |                                                          | IVR/Follow-up<br>Schedule: 2 contact<br>schedules depending<br>on NRT acceptance: if<br>not accepted, IVR calls<br>made monthly for 6<br>months; if accepted,<br>IVR calls made weekly                                                                                                                                         | Age: 49.9<br><br>% female:<br>24.2%                                                                                                      |                                                                                                                                                                                                                               |  |

|  |  |                                                                                                                     |  |  |  |
|--|--|---------------------------------------------------------------------------------------------------------------------|--|--|--|
|  |  | for 1st month, biweekly<br>for second month and<br>monthly for months 3-<br>6. Follow-up at month<br>10, 20 and 30. |  |  |  |
|--|--|---------------------------------------------------------------------------------------------------------------------|--|--|--|
